# Supplementary material for: A facile method for promoting activities of ordered mesoporous silica-anchored Rh–P complex catalysts in 1-octene hydroformylation
Source: Royal Society of Chemistry journal article supplement (doi:10.1039/b900591a), 2009-01-01

# A facile method for promoting activities of ordered mesoporous silica-anchored Rh-P complex catalysts in 1-octene hydroformylation

Wei Zhou and Dehua He\*

Screen snap of GC×MS analysis of the 18-carbon  $\alpha,\beta$ -unsaturated aldehyde produced by the dehydration of the aldol condensation adduct of nonyl aldehydes (Shimadzu GCMS-QP2010S). The signal at ca. 15.6 min in the chromatogram was determined by MS shown as follows. A molecule-ionized fragment  $m/z = 266$  can be observed, which evidences the presence of the 18-carbon  $\alpha,\beta$ -unsaturated aldehyde produced by the dehydration of the aldol condensation adduct of nonyl aldehydes ( $C_{18}H_{34}O$ , 2-heptyl-2-undecenal).

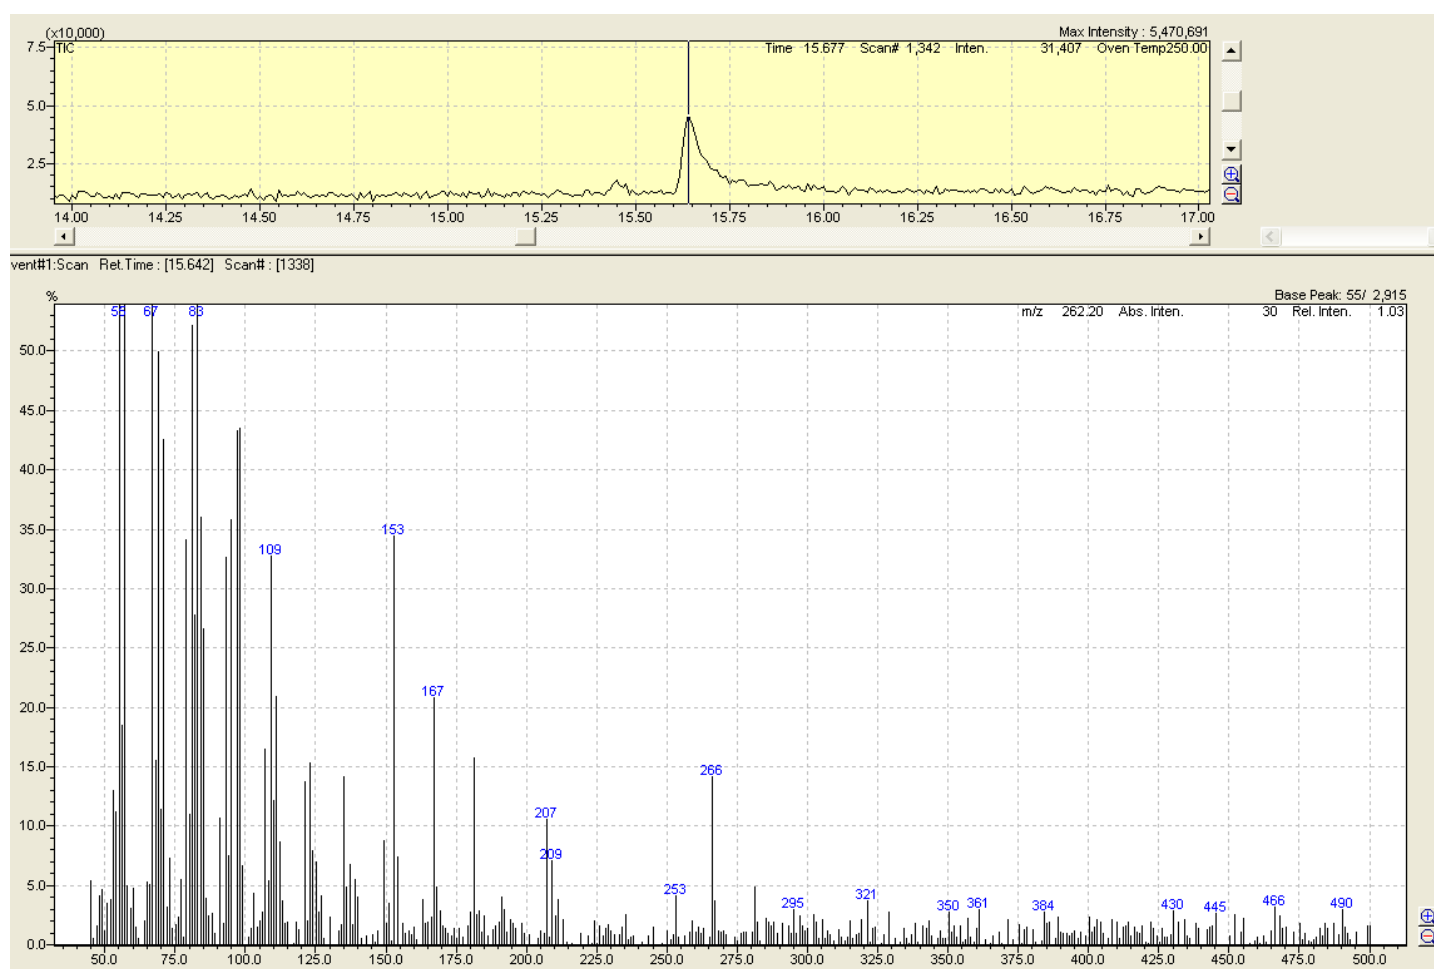

Supplement: b900591a.pdf [file b900591a.pdf]
